# Supplementary material for: Full Ce substitution on La in Tl2LaCl5: impact and performance
Source: Royal Society of Chemistry journal article supplement (doi:10.1039/d4ma00006d), 2024-01-01
Supplement: d4ma00006d1.pdf [file d4ma00006d1.pdf]

## Full Ce substitution on La in $Tl_2LaCl_5$ : impact and performance

Federico Moretti, Didier Perrodin, Joanna Szornel, and Edith D. Bourret

Lawrence Berkeley National Laboratory, 1 Cyclotron Road, Berkeley, CA 94720, USA

### *Electronic Supplementary Information*

Both  $Tl_2LaCl_5$ :5 mol% and  $Tl_2CeCl_5$  crystals, grown by the Bridgman-Stockbarger method, cracked into multiple pieces during the cooling phase. Figure S1 reports pictures of some of the largest pieces that could be recovered after opening the ampoules. These pieces appear clear, transparent, and without any coloration. Some haziness can be noticed, though it is related to unevenness of the surface in contact with the quartz growth ampoule.

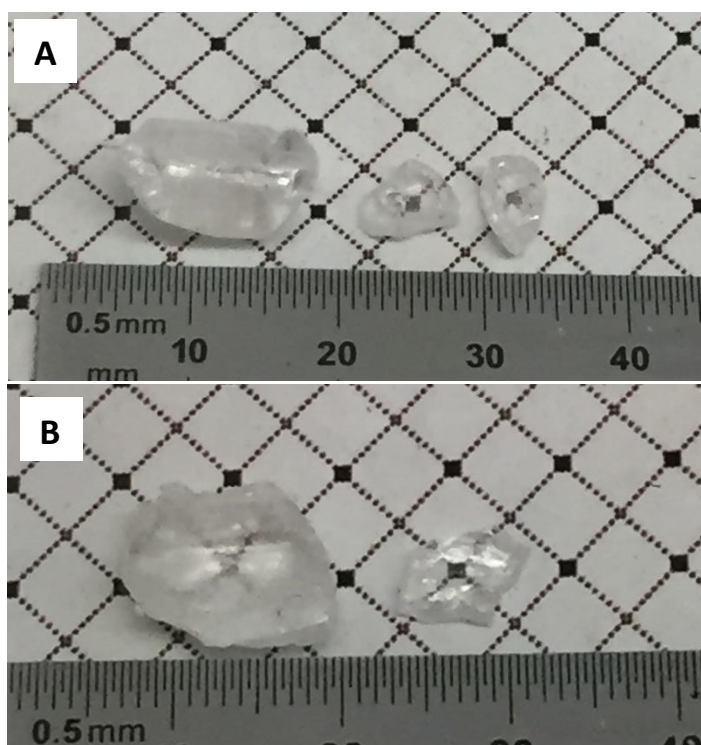

Figure S1: Photographs of single crystal pieces of  $Tl_2CeCl_5$  (panel A) and of  $Tl_2LaCl_5$ : 0.5 mol% Ce (panel B). The pieces are as recovered from the growth ampoules without any polishing or lapping process.

Figure S2 reports the powder x-ray diffractograms obtained on  $\text{Tl}_2\text{LaCl}_5$  and  $\text{Tl}_2\text{CeCl}_5$  grown crystals. The pieces ground for this characterization were selected from areas of the grown crystals close to the pieces used in the optical and scintillation characterization. The results of Rietveld refinement are reported in table S1. Both crystals have the same orthorhombic crystallographic structure that matches that of  $\text{Tl}_2\text{LaCl}_5$  previously reported.<sup>1,2</sup> The diffraction data have been obtained using a Bruker D2 Phaser X-ray diffractometer with Cu  $K\alpha$  radiation.

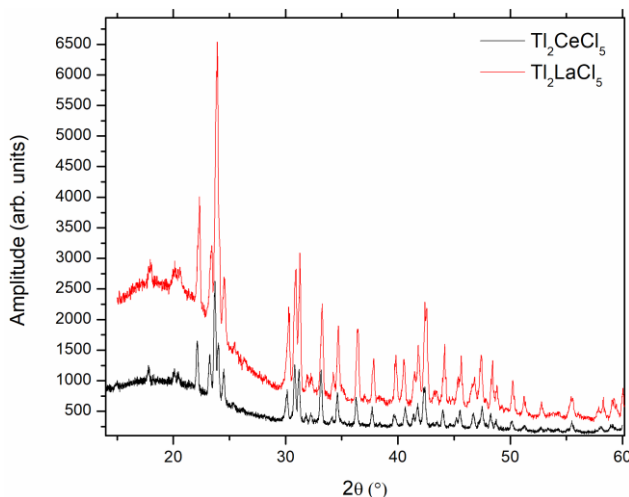

Figure S2: powder x-ray diffraction results obtained on the grown  $\text{Tl}_2\text{LaCl}_5$ :5 mol% Ce and  $\text{Tl}_2\text{CeCl}_5$  single crystals

Table S1: refined lattice parameter for  $\text{Tl}_2\text{LaCl}_5$ : 5 mol% Ce, and  $\text{Tl}_2\text{CeCl}_5$ .

| Empirical formula         | $\text{Tl}_2\text{LaCl}_5$ | $\text{Tl}_2\text{CeCl}_5$ |
|---------------------------|----------------------------|----------------------------|
| Fw (g)                    | 724.91                     | 726.15                     |
| Space group               | P n m a                    | P n m a                    |
| Space group number        | 62                         | 62                         |
| a (Å)                     | 12.835                     | 12.77                      |
| b (Å)                     | 8.967                      | 8.87                       |
| c (Å)                     | 8.098                      | 8.04                       |
| $\alpha=\beta=\gamma$ (°) | 90                         | 90                         |
| Volume (Å <sup>3</sup> )  | 932.0                      | 909.0                      |
| Z                         | 4                          | 4                          |

## References

- 1 A. Khan, P. Q. Vuong, G. Rooh, H. J. Kim and S. Kim, *J. Alloys Compd.*, 2020, **827**, 154366.
- 2 U. Shirwadkar, M. Loyd, M. H. Du, E. van Loef, G. Ciampi, L. Soundara Pandian, L.

Stand, M. Koschan, M. Zhuravleva, C. Melcher and K. Shah, *Nucl. Instruments Methods Phys. Res. Sect. A Accel. Spectrometers, Detect. Assoc. Equip.*, 2020, **962**, 163684.
